# Supplementary material for: Performance of Two HCV RNA Assays during Protease Inhibitor-Based Triple Therapy in Patients with Advanced Liver Fibrosis and Cirrhosis
Source: PubMed Central journal article supplement (PMC4229112; doi:10.1371/journal.pone.0110857), 2014-11-12
Supplement: pone.0110857.s001.pdf [file pone.0110857.s001.pdf]

| Patient ID | Protease Inhibitor | HCV GT | HCV subtype | Treatment Outcome | HCV RNA result Week 4 of PI therapy<br>(4 weeks after the end of the lead in) |              | HCV RNA result Week 12 |              | HCV RNA result Week 24 |              |
|------------|--------------------|--------|-------------|-------------------|-------------------------------------------------------------------------------|--------------|------------------------|--------------|------------------------|--------------|
|            |                    |        |             |                   | Abbott assay                                                                  | Roche Assay  | Abbott assay           | Roche Assay  | Abbott assay           | Roche Assay  |
| P001       | Telaprevir         | 1      | b           | Relapse           | 22                                                                            | <15          | <12                    | not detected | not detected           | not detected |
| P002       | Telaprevir         | 1      | b           | SVR               | <12                                                                           | not detected | not detected           | not detected | not detected           | not detected |
| P003       | Telaprevir         | 1      | b           | Breakthrough      | 295                                                                           | 2150         | 2502                   | 17200        | NA                     | NA           |
| P004       | Telaprevir         | 1      | b           | SVR               | <12                                                                           | <15          | not detected           | not detected | not detected           | not detected |
| P005       | Telaprevir         | 1      | a           | SVR               | not detected                                                                  | not detected | not detected           | not detected | not detected           | not detected |
| P006       | Telaprevir         | 1      | b           | SVR               | not detected                                                                  | not detected | not detected           | not detected | not detected           | not detected |
| P007       | Telaprevir         | 1      | a           | Non responder     | 431                                                                           | 2440         | NA                     | NA           | NA                     | NA           |
| P008       | Telaprevir         | 1      | b           | Breakthrough      | 104                                                                           | 320          | 832                    | 4220         | NA                     | NA           |
| P009       | Boceprevir         | 1      | b           | Non responder     | 36                                                                            | 1570         | 226                    | 280          | NA                     | NA           |
| P010       | Boceprevir         | 1      | b           | SVR               | <12                                                                           | 37           | NA                     | NA           | NA                     | NA           |
| P011       | Boceprevir         | 1      | b           | SVR               | <12                                                                           | <15          | NA                     | NA           | NA                     | NA           |
| P012       | Boceprevir         | 1      | b           | Non responder     | NA                                                                            | NA           | NA                     | 325          | NA                     | NA           |
| P013       | Boceprevir         | 1      | b           | SVR               | 34                                                                            | 77           | NA                     | NA           | NA                     | NA           |
| P014       | Boceprevir         | 1      | a           | Breakthrough      | <12                                                                           | <15          | <12                    | not detected | NA                     | NA           |
| P015       | Boceprevir         | 1      | b           | Non responder     | <12                                                                           | 70           | NA                     | NA           | NA                     | NA           |
| P016       | Telaprevir         | 1      | b           | SVR               | 15                                                                            | <15          | not detected           | not detected | not detected           | not detected |
| P017       | Telaprevir         | 1      | b           | SVR               | not detected                                                                  | not detected | not detected           | not detected | not detected           | not detected |
| P018       | Telaprevir         | 1      | b           | SVR               | 12                                                                            | <15          | not detected           | not detected | not detected           | not detected |
| P019       | Telaprevir         | 1      | b           | SVR               | <12                                                                           | not detected | not detected           | not detected | <12                    | not detected |
| P020       | Telaprevir         | 1      | b           | Breakthrough      | not detected                                                                  | not detected | not detected           | not detected | NA                     | 3338         |
| P021       | Telaprevir         | 1      | b           | Breakthrough      | NA                                                                            | NA           | not detected           | not detected | 1073                   | 3900         |
| P022       | Telaprevir         | 1      | b           | Relapse           | <12                                                                           | 45           | not detected           | not detected | NA                     | NA           |
| P023       | Telaprevir         | 1      | b           | SVR               | <12                                                                           | <15          | not detected           | not detected | not detected           | not detected |
| P024       | Telaprevir         | 1      | b           | SVR               | not detected                                                                  | <15          | not detected           | not detected | not detected           | not detected |
| P025       | Telaprevir         | 1      | b           | SVR               | 14                                                                            | <15          | not detected           | not detected | NA                     | NA           |
| P026       | Telaprevir         | 1      | b           | SVR               | <12                                                                           | <15          | not detected           | not detected | not detected           | not detected |
| P027       | Telaprevir         | 1      | b           | SVR               | <12                                                                           | not detected | not detected           | not detected | not detected           | not detected |
| P028       | Telaprevir         | 1      | NA          | Breakthrough      | 35                                                                            | 190          | not detected           | <15          | 2485                   | 7290         |
| P029       | Telaprevir         | 1      | b           | SVR               | <12                                                                           | <15          | not detected           | not detected | not detected           | not detected |
| P030       | Telaprevir         | 1      | a           | SVR               | <12                                                                           | not detected | not detected           | not detected | not detected           | not detected |
| P031       | Boceprevir         | 1      | b           | Non responder     | 38                                                                            | 2620         | 79                     | 650          | NA                     | NA           |
| P032       | Boceprevir         | 1      | b           | SVR               | <12                                                                           | 47           | <12                    | <15          | not detected           | not detected |
| P033       | Boceprevir         | 1      | b           | SVR               | <12                                                                           | <15          | <12                    | <15          | not detected           | not detected |
| P034       | Boceprevir         | 1      | b           | SVR               | NA                                                                            | NA           | NA                     | NA           | not detected           | not detected |
| P035       | Boceprevir         | 1      | b           | SVR               | NA                                                                            | NA           | not detected           | not detected | NA                     | NA           |
| P036       | Boceprevir         | 1      | b           | SVR               | NA                                                                            | NA           | NA                     | not detected | not detected           | not detected |
| P037       | Telaprevir         | 1      | b           | SVR               | <12                                                                           | <15          | not detected           | not detected | not detected           | not detected |

|      |            |   |   |               |              |              |              |                     |              |              |
|------|------------|---|---|---------------|--------------|--------------|--------------|---------------------|--------------|--------------|
| P038 | Telaprevir | 1 | b | SVR           | <12          | <15          | not detected | not detected        | not detected | not detected |
| P039 | Telaprevir | 1 | a | Breakthrough  | <12          | not detected | not detected | not detected        | <12          | 20           |
| P040 | Telaprevir | 1 | b | Relapse       | not detected | <15          | NA           | not detected        | <12          | not detected |
| P041 | Telaprevir | 1 | b | Relapse       | not detected | not detected | NA           | not detected        | not detected | not detected |
| P042 | Telaprevir | 1 | a | SVR           | <12          | not detected | not detected | not detected        | not detected | not detected |
| P043 | Telaprevir | 1 | b | Breakthrough  | 32           | 24           | <12          | <i>not detected</i> | NA           | NA           |
| P044 | Telaprevir | 1 | b | Breakthrough  | 91           | 59           | not detected | not detected        | NA           | NA           |
| P045 | Telaprevir | 1 | b | Breakthrough  | not detected | <15          | not detected | not detected        | NA           | NA           |
| P046 | Telaprevir | 1 | b | NA            | not detected | not detected | not detected | not detected        | NA           | NA           |
| P047 | Telaprevir | 1 | b | SVR           | <12          | not detected | NA           | not detected        | not detected | not detected |
| P048 | Telaprevir | 1 | a | Relapse       | NA           | NA           | not detected | not detected        | not detected | not detected |
| P049 | Telaprevir | 1 | b | Non responder | 237          | 665          | NA           | NA                  | NA           | NA           |
| P050 | Telaprevir | 1 | b | SVR           | not detected | not detected | not detected | not detected        | not detected | not detected |
| P051 | Telaprevir | 1 | b | SVR           | not detected | not detected | not detected | not detected        | not detected | not detected |
| P052 | Telaprevir | 1 | b | SVR           | <12          | <15          | not detected | not detected        | not detected | not detected |
| P053 | Telaprevir | 1 | b | SVR           | 17           | <15          | <12          | not detected        | not detected | not detected |
| P054 | Telaprevir | 1 | b | SVR           | not detected | not detected | not detected | not detected        | not detected | not detected |
| P055 | Telaprevir | 1 | a | Relapse       | <12          | <15          | not detected | not detected        | not detected | not detected |
| P056 | Telaprevir | 1 | b | SVR           | <12          | <15          | not detected | not detected        | NA           | NA           |
| P057 | Boceprevir | 1 | a | Non responder | 146          | 390          | 97           | 170                 | NA           | NA           |
| P058 | Boceprevir | 1 | b | SVR           | 55           | 160          | NA           | not detected        | NA           | NA           |
| P059 | Boceprevir | 1 | b | SVR           | not detected | not detected | <12          | not detected        | NA           | NA           |
| P060 | Boceprevir | 1 | b | SVR           | 20           | <15          | 12           | not detected        | NA           | NA           |
| P061 | Telaprevir | 1 | b | SVR           | NA           | <15          | not detected | not detected        | not detected | not detected |
| P062 | Telaprevir | 1 | b | SVR           | not detected | not detected | <12          | not detected        | <12          | not detected |
| P063 | Telaprevir | 1 | b | SVR           | NA           | not detected | not detected | not detected        | not detected | not detected |
| P064 | Telaprevir | 1 | a | Breakthrough  | 13           | 33           | not detected | not detected        | NA           | NA           |
| P065 | Telaprevir | 1 | b | SVR           | not detected | <15          | <12          | not detected        | not detected | not detected |
| P066 | Telaprevir | 1 | b | Relapse       | <12          | not detected | not detected | not detected        | not detected | not detected |
| P067 | Telaprevir | 1 | b | SVR           | not detected | not detected | not detected | not detected        | not detected | not detected |
| P068 | Telaprevir | 1 | b | SVR           | <12          | not detected | not detected | not detected        | not detected | not detected |
| P069 | Boceprevir | 1 | a | Relapse       | NA           | NA           | not detected | not detected        | NA           | NA           |
| P070 | Boceprevir | 1 | b | SVR           | 14           | not detected | <12          | not detected        | NA           | NA           |
| P071 | Boceprevir | 1 | a | SVR           | not detected | not detected | not detected | not detected        | NA           | NA           |
| P072 | Boceprevir | 1 | b | Breakthrough  | <12          | <15          | not detected | not detected        | NA           | NA           |
| P073 | Telaprevir | 1 | b | Non responder | <12          | <15          | not detected | <15                 | NA           | NA           |
| P074 | Telaprevir | 1 | a | Breakthrough  | <12          | 91           | 186          | 959                 | NA           | NA           |
| P075 | Telaprevir | 1 | b | Breakthrough  | <12          | not detected | not detected | <i>not detected</i> | NA           | NA           |
| P076 | Telaprevir | 1 | b | Breakthrough  | <12          | 85           | <12          | <15                 | NA           | NA           |
| P077 | Telaprevir | 1 | a | Relapse       | <12          | <15          | not detected | not detected        | not detected | not detected |

|      |            |   |    |               |              |              |              |              |              |              |
|------|------------|---|----|---------------|--------------|--------------|--------------|--------------|--------------|--------------|
| P078 | Telaprevir | 1 | b  | SVR           | not detected | not detected | not detected | not detected | not detected | not detected |
| P079 | Telaprevir | 1 | b  | Breakthrough  | 28           | <15          | not detected | not detected | NA           | NA           |
| P080 | Telaprevir | 1 | a  | SVR           | <12          | not detected | not detected | not detected | not detected | not detected |
| P081 | Telaprevir | 1 | b  | SVR           | not detected | not detected | not detected | not detected | not detected | not detected |
| P082 | Telaprevir | 1 | b  | SVR           | <12          | <15          | NA           | not detected | NA           | NA           |
| P083 | Telaprevir | 1 | b  | SVR           | <12          | <15          | NA           | not detected | not detected | not detected |
| P084 | Telaprevir | 1 | b  | SVR           | not detected | not detected | NA           | not detected | not detected | not detected |
| P085 | Telaprevir | 1 | b  | Breakthrough  | <12          | <15          | 2046         | 6990         | NA           | NA           |
| P086 | Telaprevir | 1 | a  | SVR           | not detected | not detected | not detected | not detected | NA           | NA           |
| P087 | Boceprevir | 1 | b  | Breakthrough  | NA           | NA           | 62           | 231          | 2451         | 13500        |
| P088 | Boceprevir | 1 | b  | Non responder | NA           | NA           | 2556         | 7230         | NA           | NA           |
| P089 | Boceprevir | 1 | NA | SVR           | NA           | NA           | not detected | not detected | not detected | not detected |
| P090 | Boceprevir | 1 | b  | SVR           | NA           | NA           | NA           | NA           | not detected | not detected |
| P091 | Boceprevir | 1 | a  | Relapse       | NA           | NA           | <12          | not detected | not detected | not detected |
| P092 | Boceprevir | 1 | NA | SVR           | NA           | NA           | NA           | NA           | not detected | not detected |
| P093 | Boceprevir | 1 | b  | SVR           | NA           | NA           | not detected | not detected | not detected | not detected |
| P094 | Boceprevir | 1 | b  | Breakthrough  | NA           | NA           | 59           | 176          | 36725        | 73700        |
| P095 | Boceprevir | 1 | b  | SVR           | NA           | NA           | NA           | NA           | not detected | not detected |
| P096 | Boceprevir | 1 | b  | Breakthrough  | NA           | NA           | <12          | 22           | <12          | <15          |
| P097 | Boceprevir | 1 | NA | Breakthrough  | NA           | NA           | <12          | <15          | <12          | not detected |
| P098 | Boceprevir | 1 | b  | SVR           | NA           | NA           | not detected | not detected | NA           | NA           |
| P099 | Boceprevir | 1 | NA | SVR           | NA           | NA           | not detected | not detected | NA           | NA           |
| P100 | Boceprevir | 1 | a  | Breakthrough  | NA           | NA           | NA           | NA           | 1331         | 4330         |
| P101 | Boceprevir | 1 | b  | Relapse       | NA           | NA           | NA           | NA           | not detected | not detected |
| P102 | Boceprevir | 1 | b  | Breakthrough  | NA           | NA           | <12          | not detected | 330          | 1210         |
| P103 | Boceprevir | 1 | b  | Relapse       | NA           | NA           | not detected | not detected | not detected | not detected |
| P104 | Boceprevir | 1 | b  | SVR           | NA           | NA           | not detected | not detected | not detected | not detected |
| P105 | Boceprevir | 1 | b  | SVR           | NA           | NA           | not detected | <15          | NA           | NA           |
| P106 | Boceprevir | 1 | b  | Relapse       | NA           | NA           | NA           | NA           | not detected | not detected |
| P107 | Boceprevir | 1 | NA | SVR           | NA           | NA           | not detected | not detected | not detected | not detected |
| P108 | Boceprevir | 1 | b  | Relapse       | NA           | NA           | not detected | not detected | not detected | not detected |
| P109 | Boceprevir | 1 | b  | SVR           | NA           | NA           | not detected | not detected | not detected | not detected |
| P110 | Boceprevir | 1 | NA | SVR           | NA           | NA           | not detected | not detected | <12          | not detected |
| P111 | Boceprevir | 1 | b  | NA            | NA           | NA           | <12          | <15          | <12          | not detected |
| P112 | Boceprevir | 1 | a  | SVR           | NA           | NA           | not detected | not detected | not detected | not detected |
| P113 | Boceprevir | 1 | NA | Breakthrough  | NA           | NA           | not detected | not detected | NA           | NA           |
| P114 | Boceprevir | 1 | b  | Breakthrough  | NA           | NA           | 24           | 64           | <12          | <15          |
| P115 | Boceprevir | 1 | NA | Relapse       | NA           | NA           | not detected | <15          | <12          | not detected |
| P116 | Boceprevir | 1 | b  | NA            | NA           | NA           | 80           | 47           | not detected | not detected |
| P117 | Boceprevir | 1 | b  | Non responder | NA           | NA           | 226          | 408          | NA           | NA           |

|      |            |   |    |               |    |    |              |              |              |              |
|------|------------|---|----|---------------|----|----|--------------|--------------|--------------|--------------|
| P118 | Boceprevir | 1 | b  | Non responder | NA | NA | 217          | 510          | NA           | NA           |
| P119 | Boceprevir | 1 | a  | Non responder | NA | NA | 44381        | 116000       | NA           | NA           |
| P120 | Boceprevir | 1 | b  | SVR           | NA | NA | not detected | not detected | not detected | not detected |
| P121 | Boceprevir | 1 | b  | SVR           | NA | NA | not detected | not detected | not detected | not detected |
| P122 | Boceprevir | 1 | b  | NA            | NA | NA | not detected | not detected | not detected | not detected |
| P123 | Boceprevir | 1 | b  | Relapse       | NA | NA | 30           | 33           | <12          | not detected |
| P124 | Boceprevir | 1 | b  | Relapse       | NA | NA | <12          | <15          | not detected | not detected |
| P125 | Boceprevir | 1 | b  | SVR           | NA | NA | NA           | NA           | not detected | not detected |
| P126 | Boceprevir | 1 | NA | Relapse       | NA | NA | not detected | not detected | not detected | not detected |
| P127 | Boceprevir | 1 | b  | SVR           | NA | NA | <12          | <15          | not detected | not detected |
| P128 | Boceprevir | 1 | NA | SVR           | NA | NA | <12          | <15          | not detected | not detected |
| P129 | Boceprevir | 1 | b  | Non responder | NA | NA | 607115       | 176000       | NA           | NA           |
| P130 | Boceprevir | 1 | b  | Relapse       | NA | NA | NA           | not detected | not detected | not detected |
| P131 | Boceprevir | 1 | b  | SVR           | NA | NA | not detected | not detected | not detected | not detected |
| P132 | Boceprevir | 1 | b  | SVR           | NA | NA | not detected | not detected | not detected | not detected |
| P133 | Boceprevir | 1 | b  | Relapse       | NA | NA | <12          | not detected | not detected | not detected |
| P134 | Boceprevir | 1 | b  | SVR           | NA | NA | NA           | NA           | not detected | not detected |
| P135 | Boceprevir | 1 | NA | Non responder | NA | NA | 1027         | 1580         | NA           | NA           |
| P136 | Boceprevir | 1 | NA | Breakthrough  | NA | NA | 21           | 49           | 49652        | 45100        |
| P137 | Boceprevir | 1 | b  | SVR           | NA | NA | NA           | NA           | not detected | not detected |
| P138 | Boceprevir | 1 | b  | Non responder | NA | NA | 177          | 344          | NA           | NA           |
| P139 | Boceprevir | 1 | b  | Relapse       | NA | NA | not detected | not detected | not detected | not detected |
| P140 | Boceprevir | 1 | b  | SVR           | NA | NA | not detected | not detected | not detected | not detected |
| P141 | Boceprevir | 1 | b  | SVR           | NA | NA | not detected | <15          | not detected | not detected |
| P142 | Boceprevir | 1 | b  | Breakthrough  | NA | NA | not detected | not detected | not detected | not detected |
| P143 | Boceprevir | 1 | b  | Non responder | NA | NA | 229          | 1080         | NA           | NA           |
| P144 | Boceprevir | 1 | b  | SVR           | NA | NA | not detected | not detected | NA           | NA           |
| P145 | Boceprevir | 1 | b  | SVR           | NA | NA | NA           | NA           | not detected | not detected |
| P146 | Boceprevir | 1 | b  | Non responder | NA | NA | 67           | 529          | NA           | NA           |
| P147 | Boceprevir | 1 | b  | SVR           | NA | NA | not detected | not detected | not detected | not detected |
| P148 | Boceprevir | 1 | NA | Non responder | NA | NA | 2485         | 4660         | NA           | NA           |
| P149 | Boceprevir | 1 | b  | Non responder | NA | NA | 482          | 891          | NA           | NA           |
| P150 | Boceprevir | 1 | b  | SVR           | NA | NA | <12          | not detected | not detected | not detected |
| P151 | Boceprevir | 1 | b  | Breakthrough  | NA | NA | 18           | 31           | 87           | 687          |
| P152 | Boceprevir | 1 | b  | Non responder | NA | NA | 32598        | 24300        | NA           | NA           |
| P153 | Boceprevir | 1 | b  | Non responder | NA | NA | 356          | 840          | NA           | NA           |
| P154 | Boceprevir | 1 | b  | Relapse       | NA | NA | NA           | NA           | not detected | not detected |
| P155 | Boceprevir | 1 | NA | Non responder | NA | NA | 371593       | 664000       | NA           | NA           |
| P156 | Boceprevir | 1 | NA | NA            | NA | NA | not detected | <15          | NA           | NA           |
| P157 | Boceprevir | 1 | b  | SVR           | NA | NA | <12          | <15          | not detected | not detected |

|      |            |   |    |               |    |    |              |              |              |              |
|------|------------|---|----|---------------|----|----|--------------|--------------|--------------|--------------|
| P158 | Boceprevir | 1 | b  | Breakthrough  | NA | NA | 31           | 52           | 94           | 238          |
| P159 | Boceprevir | 1 | b  | Non responder | NA | NA | 281          | 735          | NA           | NA           |
| P160 | Boceprevir | 1 | b  | SVR           | NA | NA | <12          | <15          | not detected | not detected |
| P161 | Boceprevir | 1 | b  | Breakthrough  | NA | NA | <12          | <15          | 599          | 2100         |
| P162 | Boceprevir | 1 | a  | Non responder | NA | NA | 17099        | 28200        | NA           | NA           |
| P163 | Boceprevir | 1 | b  | SVR           | NA | NA | NA           | not detected | not detected | not detected |
| P164 | Boceprevir | 1 | b  | Non responder | NA | NA | <12          | 344          | NA           | NA           |
| P165 | Boceprevir | 1 | b  | Breakthrough  | NA | NA | not detected | 20           | NA           | 42900        |
| P166 | Boceprevir | 1 | NA | SVR           | NA | NA | <12          | <15          | not detected | not detected |
| P167 | Boceprevir | 1 | b  | SVR           | NA | NA | not detected | not detected | not detected | not detected |
| P168 | Boceprevir | 1 | NA | Non responder | NA | NA | NA           | NA           | 1341040      | 3150000      |
| P169 | Boceprevir | 1 | b  | Breakthrough  | NA | NA | not detected | not detected | 520312       | 1660000      |
| P170 | Boceprevir | 1 | b  | Non responder | NA | NA | 430          | 1120         | NA           | NA           |
| P171 | Boceprevir | 1 | b  | Breakthrough  | NA | NA | <12          | <15          | 8845         | 12800        |
| P172 | Boceprevir | 1 | b  | SVR           | NA | NA | NA           | NA           | <12          | not detected |
| P173 | Boceprevir | 1 | b  | Relapse       | NA | NA | NA           | not detected | <12          | <15          |
| P174 | Boceprevir | 1 | b  | Breakthrough  | NA | NA | NA           | NA           | <12          | <15          |
| P175 | Boceprevir | 1 | b  | SVR           | NA | NA | not detected | not detected | not detected | not detected |
| P176 | Boceprevir | 1 | b  | Relapse       | NA | NA | 14           | 19           | NA           | not detected |
| P177 | Boceprevir | 1 | NA | SVR           | NA | NA | <12          | not detected | not detected | not detected |
| P178 | Boceprevir | 1 | b  | NA            | NA | NA | <12          | <15          | not detected | <15          |
| P179 | Boceprevir | 1 | b  | SVR           | NA | NA | NA           | NA           | not detected | not detected |
| P180 | Boceprevir | 1 | a  | SVR           | NA | NA | not detected | not detected | not detected | not detected |
| P181 | Boceprevir | 1 | NA | Relapse       | NA | NA | <12          | <15          | not detected | not detected |
| P182 | Boceprevir | 1 | NA | Breakthrough  | NA | NA | <12          | <15          | 25324        | 49500        |
| P183 | Boceprevir | 1 | b  | SVR           | NA | NA | NA           | NA           | not detected | not detected |
| P184 | Boceprevir | 1 | b  | Non responder | NA | NA | 134          | 367          | NA           | NA           |
| P185 | Boceprevir | 1 | b  | Relapse       | NA | NA | not detected | <15          | NA           | NA           |
| P186 | Boceprevir | 1 | NA | SVR           | NA | NA | not detected | not detected | not detected | not detected |
| P187 | Boceprevir | 1 | b  | Non responder | NA | NA | 132          | 397          | NA           | NA           |
| P188 | Boceprevir | 1 | b  | Non responder | NA | NA | 105          | 151          | NA           | 60           |
| P189 | Boceprevir | 1 | b  | SVR           | NA | NA | not detected | not detected | not detected | not detected |
| P190 | Boceprevir | 1 | b  | Relapse       | NA | NA | <12          | <15          | <12          | <15          |
| P191 | Boceprevir | 1 | b  | Relapse       | NA | NA | NA           | NA           | not detected | not detected |

NA = not available
